# Supplementary material for: Late Side Effects in Normal Mouse Brain Tissue After Proton Irradiation
Source: Frontiers journal article supplement (doi:10.3389/fonc.2020.598360), 2021-01-11
Supplement: Data_Sheet_1.pdf [file Data_Sheet_1.pdf]

Supplementary

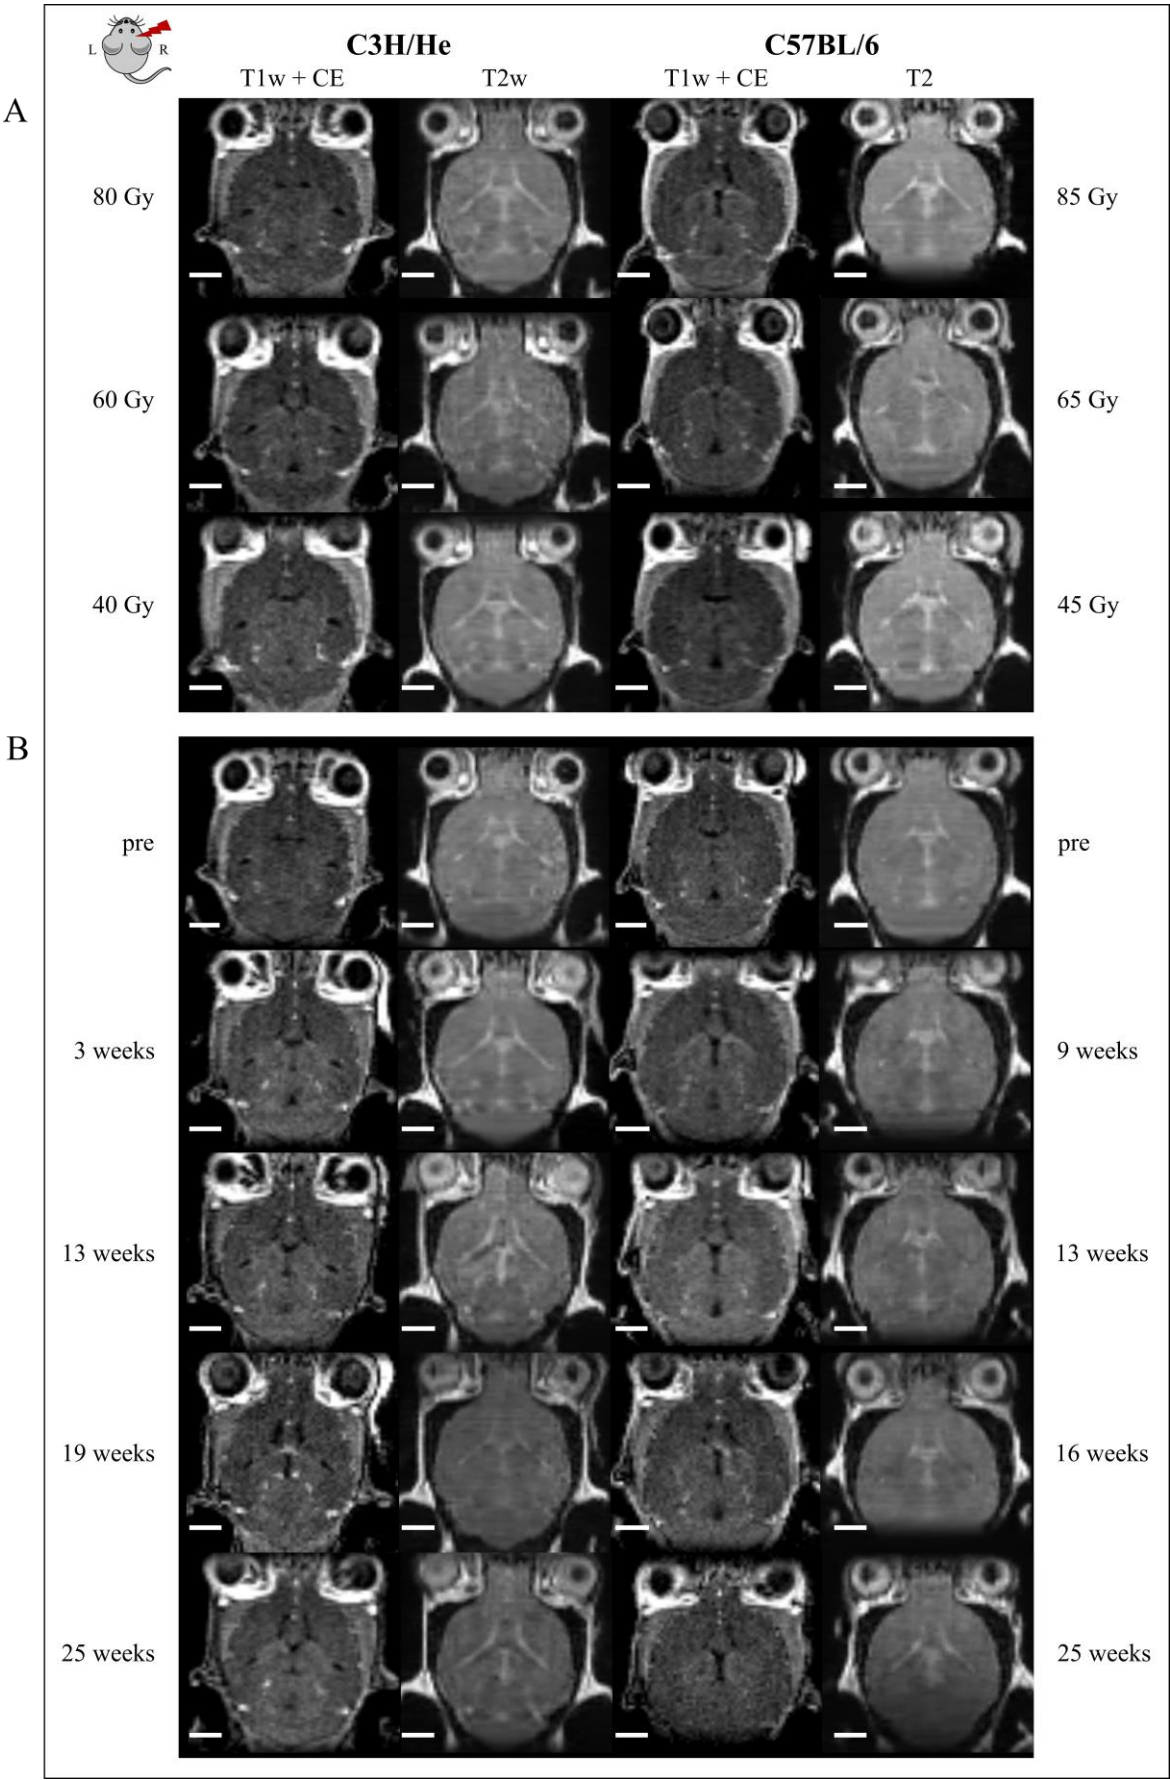

Figure S1: Control MRI measurements. (A) Scans before irradiation served as internal control for each individual mouse. One selected mouse per dose group and strain is shown as example. (B) Longitudinal measurements of the unirradiated age controls. No alterations were observed for any of the control MRI scans. Scale bars 2 mm.

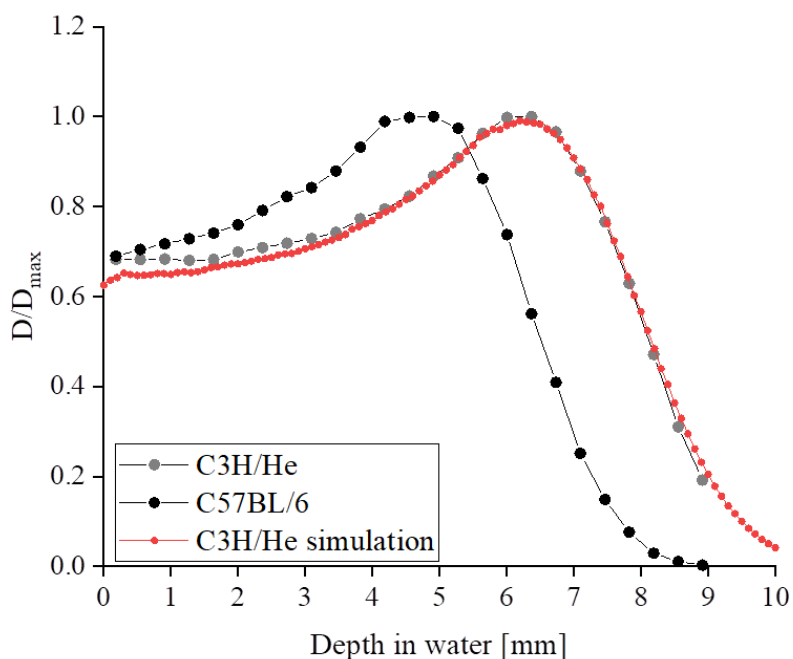

Figure S2: Proton depth dose distributions reconstructed from EBT3 film stacks at mouse head position in the respective setup for C57BL/6 (black dots) and C3H/He mice (grey dots). For comparison, the depth dose distribution simulated on basis of a computed tomography of an EBT3 film stack at the position of a C3H mouse is shown (red). The small deviation at the entrance is probably caused by positioning uncertainties of the film stack.

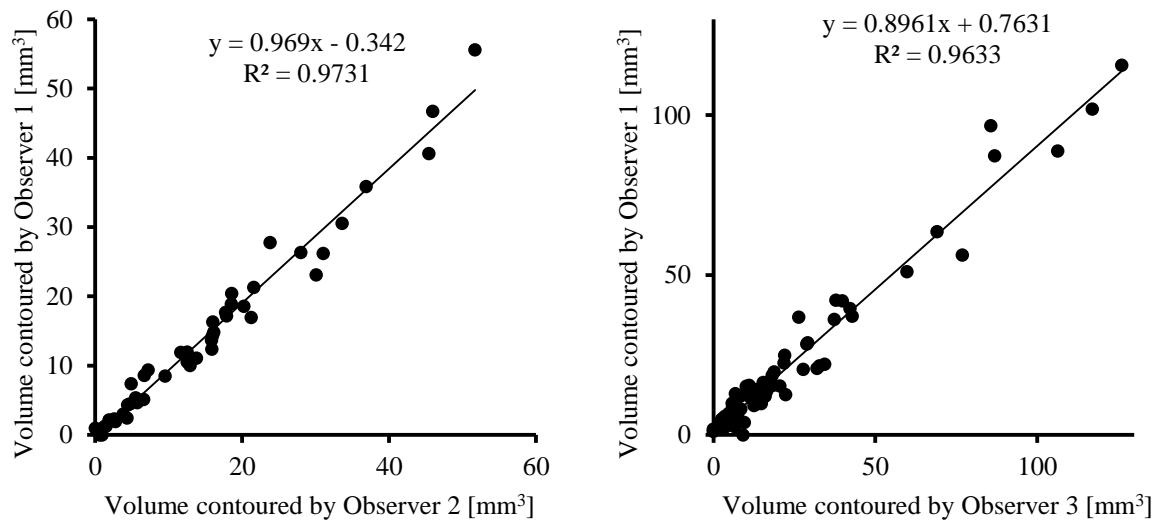

Figure S3: Inter-observer variability of CE volume contouring. Each measurement was evaluated by two independent experimenters, with comparable outcomes.

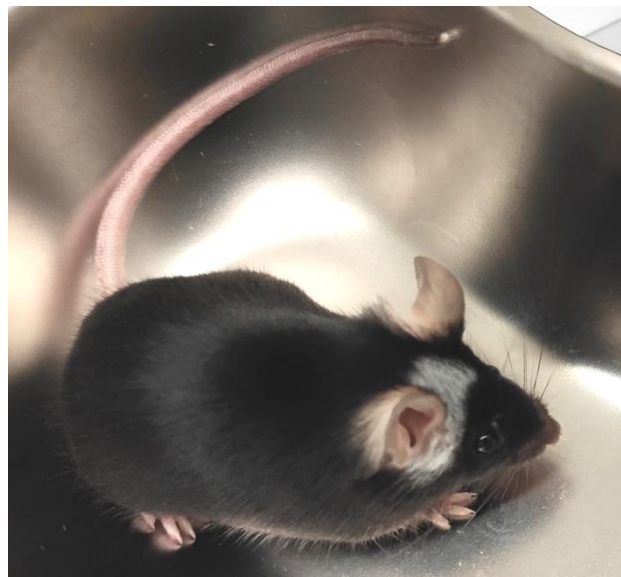

Figure S4: Hair whitening in a C57BL/6 mouse after proton brain irradiation of the right hemisphere.

Table S1: Score Sheet for mouse health assessment

| Parameter                                       | Observation                                                                                                            | Score |
|-------------------------------------------------|------------------------------------------------------------------------------------------------------------------------|-------|
| Reduction of body weight                        | normal                                                                                                                 | 0     |
|                                                 | 8-10% reduction                                                                                                        | 1     |
|                                                 | 10-15% reduction                                                                                                       | 2     |
|                                                 | > 20% reduction                                                                                                        | 5     |
| General appearance                              | open, clear eyes; even, normal breathing; clean orifices                                                               | 0     |
|                                                 | reduced or missing grooming; untended orifices                                                                         | 1     |
|                                                 | clotted orifices, increased tonicity, visibly enhanced breathing                                                       | 2     |
|                                                 | bent, abnormal body posture; unclear or closed eyes; high tonicity; strongly enhanced breathing                        | 5     |
| Behaviour                                       | normal; regular food and water intake; aktiv and aware, curious; social contacts, grooming                             | 0     |
|                                                 | slight alterations, decreased reaction, partly reduced mobility and motor functions                                    | 1     |
|                                                 | unusual, crouching; partly apart from group; slight ataxia; reduced movements                                          | 2     |
|                                                 | strongly reduced activity, defence and social behaviour; self-isolation, apathy, palsy; sounds of pain during handling | 5     |
| Skin reaction in and around the irradiated area | no acute skin reaction                                                                                                 | 0     |
|                                                 | skin reaction grade 1                                                                                                  | 1     |
|                                                 | skin reaction grade 2                                                                                                  | 2     |
|                                                 | skin reaction > grade 2                                                                                                | 5     |

|                         |                                                                                                       |
|-------------------------|-------------------------------------------------------------------------------------------------------|
| <b>Score 1-2:</b>       | minor burden; monitor closely                                                                         |
| <b>Score 3-4:</b>       | intermediate burden; inform veterinarian, analgesia if necessary; closer observation (every 1-2 days) |
| <b>Score 5 or more:</b> | high burden, immediately sacrifice animal by cervical dislocation                                     |

Table S2: Score Sheet for grading of skin reaction. Adapted from (43).

| Grade | Observation                                                          |
|-------|----------------------------------------------------------------------|
| 0     | normal                                                               |
| 1     | follicular, faint or dull erythema; epilation; dry desquamation      |
| 2     | tender or bright erythema; patchy moist desquamation; moderate edema |
| 3     | confluent, moist desquamation; pitting edema                         |
| 4     | ulceration; hemorrhage; necrosis                                     |

Table S3: List of used antibodies

| # | Primary antibodies  | Supplier      | Cat.no.     | Dilution | 2nd #  |
|---|---------------------|---------------|-------------|----------|--------|
| 1 | rat anti-GFAP       | EMD Millipore | 345860      | 2000     | 1 or 2 |
| 2 | rabbit anti-Iba1    | Abcam         | ab178846    | 1000     | 3 or 4 |
| 3 | chicken anti-Nestin | GeneTex       | GTX85457-50 | 1000     | 5      |
| 4 | rat anti-Ki67       | BD Bioscience | 14-5698-80  | 200      | 1      |

| # | Secondary antibodies    | Supplier   | Cat.no.   | Dilution | 1st # |
|---|-------------------------|------------|-----------|----------|-------|
| 1 | anti-rat Alexa488       | Invitrogen | A21208    | 500      | 1, 4  |
| 2 | anti-rat Alexa594       | Abcam      | ab150152  | 500      | 1     |
| 3 | anti-rabbit Alexa488    | Invitrogen | A21206    | 500      | 2     |
| 4 | anti-rabbit Alexa594    | Invitrogen | A11012    | 500      | 2     |
| 5 | anti-chicken Dylight750 | Invitrogen | SA5-10075 | 500      | 3     |
