# Supplementary material for: Late Side Effects in Normal Mouse Brain Tissue After Proton Irradiation
Source: Front Oncol. 2021 Jan 11;10:598360. doi: 10.3389/fonc.2020.598360 (PMC7842140; doi:10.3389/fonc.2020.598360)
Supplement: Supplementary file 2 [file Table_1.xlsx]

## Sheet: Signal onset & survival
		T1		T2		Survival
Dose	#	Time [w]	Status	Time [w]	Status	Time [w]	Status
85	B6_M1	1	1	3	1	8.28571	1
65	B6_M2	3	1	7	1	25	0
45	B6_M3	9	1	25	0	25	0
85	B6_M4	1	1	3	1	11.4286	1
65	B6_M5	2	1	11	1	25	0
45	B6_M6	9	1	25	0	24.8571	0
45	B6_M7	9	1	25	0	25	0
85	B6_M8	1	1	3	1	12.8571	1
65	B6_M9	5	1	9	1	24.8571	0
0	B6_M10	25	0	25	0	24.5714	0
40	C3H_M1	11	1	25	1	25.8571	0
60	C3H_M2	5	1	11	1	16.8571	1
80	C3H_M3	1	1	5	1	10	1
40	C3H_M4	11	1	25	0	25.8571	0
60	C3H_M5	5	1	13	1	14.1429	1
80	C3H_M6	1	1	3	1	7.28571	1
0	C3H_M8	26	0	25	0	25.8571	0
80	C3H_M9	1	1	3	1	10.2857	1
60	C3H_M10	3	1	11	1	25.8571	0
40	C3H_M11	9	1	25	0	24.1429	1

## Sheet: Average CE-volumes
data not available		deceased		Unit: mm3
C57BL/6	1	2	3	5	7	8	9	11	13	15	16	20	25
M1	6.755		19.255	28.595	40.87	87.085
M2	0		10.17	8.27	11.61		13.66	13.155		16.61	16.785	24.105	36.74
M3	0		0	0	0		0.46	1.13			1.395	2.335	2.01
M4		12.425	14.12	21.45	26.585		28.625	46.33
M5		11.475	12.23		15.47		17.53	13.475			19.395	18.73	27.15
M6	0		0	0	0		3.395	4.365	4.585		5.44	0.32	2.44
M7	0		0	0	0		1.28	5.185	8.275		5.855	3.385	0.48
M8	7.63		11.51	19.09	32.055		36.36	42.995	53.645
M9		0	0	6.135	9		11.795	15.13	16.15		17.72	25.78	19.495
C3H	1	3	5	7	9	10	11	13	14	15	17	19	21	23	24	26
M1	0	0	0	0	0.52		1.385	3.965		4.585	2.585	5.695	3.595		7.295	7.815
M2	0	0	5.36	12.66	17.955		18.365	28.27		26.44	120.87
M3	5.63	22.2	28.93	66.28	55.41	91.215
M4	0	0	0	0	0		1.82	0.905		2.505	3.48		2.245			5.785
M5	0	0	4.58		17.455		27.205	40.88	66.58
M6	9.82	23.455	39.985	97.59
M9	4.675	13.28	31.585	39.96	109.43
M10	0		6.75	14.87	10.83		11.395	12.27		14.905	16.83		13.19	14.01		14.75
M11	0	0	0	0	3.8		3.98	2.73		3.085	2.42	3.76	1.98	3.485	censored	censored

## Sheet: VDT Model
For model predictions on specific dose values, please enter these doses into the red boxes
			Volume	= 10^[ (D - D_0) * a * T^b) ] [ml]
			week_start	= c1 + c2*ln(D) [weeks]
	mouse	a	b / Gy-1	D_0 / Gy		c1	c2		V_max / ml		pR2
	C3H	0.0155	0.4	30		55.75	-12.5		120		0.8
	Bl6	0.0155	0.28	30		55.75	-12.5		60		0.76
C3H/He:		D / Gy				C57BL/6:		D / Gy
	T / weeks	40	60	80			T / weeks	45	65	85
	1			5.95662			1			7.12033
	2			10.5346			2			10.8418
	3			15.947			3			14.4393
	4			22.3539			4		6.30654	18.064
	5		7.67713	29.8766			5		7.1016	21.7694
	6		8.95711	38.6319			6		7.86949	25.5809
	7		10.2974	48.7391			7		8.61915	29.5131
	8		11.7028	60.3229			8		9.35626	33.5751
	9		13.1772	73.5147			9	2.69241	10.0847	37.7732
	10	2.45099	14.724	88.4529			10	2.77345	10.8072	42.1119
	11	2.53789	16.3462	105.284			11	2.85103	11.5258	46.595
	12	2.623	18.0465				12	2.92565	12.242	51.2253
	13	2.70659	19.8276				13	2.99771	12.9572	56.0054
	14	2.7889	21.6921				14	3.06752	13.6721
	15	2.8701	23.6424				15	3.13532	14.3877
	16	2.95034	25.6813				16	3.20134	15.1045
	17	3.02974	27.811				17	3.26575	15.8232
	18	3.10842	30.0343				18	3.3287	16.544
	19	3.18645	32.3535				19	3.39033	17.2676
	20	3.26393	34.7713				20	3.45074	17.994
	21	3.34091	37.2902				21	3.51003	18.7237
	22	3.41747	39.9129				22	3.56829	19.4569
	23	3.49365	42.6419				23	3.6256	20.1939
	24	3.56949	45.48				24	3.68202	20.9347
	25	3.64506	48.4298				25	3.7376	21.6796

## Sheet: Inter-observer comparison (MRI)
Observer 1	Observer 2		Observer 1	Observer 3		Unit: mm3
0.92	0		0	1.04
1.17	1.09		0.93	1.84
1.49	1.3		4.85	3.08
2.75	1.92		6.63	2.54
1.88	2.14		3.15	2.02
13.78	11.07		4.66	6.73
15.87	12.37		2.5	4.69
21.59	21.31		5.87	8.72
30.09	23.08		5.75	9.88
31.05	26.2		5.41	5.31
45.95	46.71		10.12	15.2
12.92	10.03		20.58	15.33
12.52	11.94		18.17	18.56
16.13	14.81		34.42	22.12
17.89	17.17		32.05	20.83
20.23	18.56		126.18	115.56
18.55	18.91		5.23	6.03
27.98	26.32		21.86	22.54
3.8	2.99		29.1	28.76
4.41	4.32		69.06	63.5
4.71	4.46		59.8	51.02
5.52	5.36		85.72	96.71
0.64	0		1.19	2.45
2.59	2.29		0	1.81
1.33	1.23		2.05	2.96
5.7	4.67		3.49	3.47
7.2	9.35		1.81	2.68
6.58	5.13		6.11	5.46
4.33	2.44		9.16	0
0	0.96		22.35	12.56
6.66	8.6		32.82	21.59
12.5	10.52		42.19	39.57
21.23	16.95		76.89	56.27
33.59	30.52		6.77	12.87
36.89	35.83		22.02	24.89
45.41	40.58		37.8	42.17
51.7	55.59		106.4	88.78
4.89	7.38		3.55	5.8
9.51	8.49		11.06	15.5
11.66	11.93		26.33	36.84
15.96	14.3		42.85	37.07
16.01	16.29		117.02	101.84
17.75	17.69		15.35	16.4
23.79	27.77		9.6	3.9
18.56	20.43		15.51	14.23
15.83	13.67		12.5	9.16
			13.23	9.56
			14.76	9.78
			16.35	13.46
			17.43	16.23
			13.58	12.8
			15.94	12.08
			2.65	4.95
			4.76	3.2
			2.67	2.79
			2.11	4.06
			1.97	2.87
			4.07	3.45
			2.08	1.88
			3.31	3.66
			7.48	6.03
			18.76	19.75
			28.79	28.4
			39.77	41.97
			86.88	87.29
			8.22	12.12
			8.45	8.09
			11.38	11.84
			13.08	14.24
			11.67	14.64
			16.8	16.42
			18.19	15.38
			27.72	20.49
			37.37	36.11
